# Supplementary material for: Trends and Regional Variation in Prevalence of Cardiovascular Risk Factors and Association With Socioeconomic Status in Canada, 2005-2016
Source: PubMed Central journal article supplement (PMC8377569; doi:10.1001/jamanetworkopen.2021.21443), 2021-08-19
Supplement: jamanetwopen-e2121443-s001.pdf [file jamanetwopen-e2121443-s001.pdf]

## Supplemental Online Content

Dai H, Younis A, Kong JD, Bragazzi NL, Wu J. Trends and regional variation in prevalence of cardiovascular risk factors and association with socioeconomic status in Canada, 2005-2016. *JAMA Netw Open*. 2021;4(8):e2121443. doi:10.1001/jamanetworkopen.2021.21443

**eTable 1.** Health Regions Combined to Ensure Historically Stable Units of Analysis

**eTable 2.** Neighboring Health Regions Combined Due to Small Populations

**eTable 3.** Age- and Sex-Adjusted Prevalence of Cardiovascular Risk Factors by Age Group

**eTable 4.** Health Regions With Most Rapid Increase or Decline in Age- and Sex-Adjusted Prevalence of Cardiovascular Risk Factors

**eFigure 1.** Health Region–Level Age- and Sex-Adjusted Prevalence of Hypertension

**eFigure 2.** Health Region–Level Age- and Sex-Adjusted Prevalence of Diabetes

**eFigure 3.** Health Region–Level Age- and Sex-Adjusted Prevalence of Obesity

**eFigure 4.** Health Region–Level Age- and Sex-Adjusted Prevalence of Current Smoking

**eFigure 5.** Age-Adjusted Prevalence of Cardiovascular Risk Factors by Income Quartile and Sex

This supplemental material has been provided by the authors to give readers additional information about their work.

**eTable 1.** Health Regions Combined to Ensure Historically Stable Units of Analysis

| <b>Province</b>           | <b>Group</b> | <b>Areas</b>                                                                                                       | <b>Name of Combined areas</b>                                  |
|---------------------------|--------------|--------------------------------------------------------------------------------------------------------------------|----------------------------------------------------------------|
| Newfoundland and Labrador | 1            | Western Regional Integrated Health Authority (1013), Labrador-Grenfell Regional Integrated Health Authority (1014) | Western/Labrador-Grenfell Regional Integrated Health Authority |
| Nova Scotia               | 1            | Zone 2 – Northern (1202), Zone 3 – Eastern (1203)                                                                  | Zone – Northern/ Eastern                                       |
| New Brunswick             | 1            | Zone 2 (Saint John Area, 1302), Zone 3 (Fredericton Area, 1303)                                                    | Zone (Saint/ Fredericton Area)                                 |
| Quebec                    | 1            | Région de l'Estrie (2405), Région de la Montérégie (2416)                                                          | Région l'Estrie/Montérégie                                     |
| Manitoba                  | 1            | Winnipeg Regional Health Authority (4601), Northern Regional Health Authority (4604)                               | Winnipeg/Northern Regional Health Authority                    |
| Alberta                   | 1            | Calgary Zone (4832), Central Zone (4833)                                                                           | Calgary/Central Zone                                           |
|                           | 2            | Edmonton Zone (4834), North Zone (4835)                                                                            | Edmonton/North Zone                                            |

**eTable 2.** Neighboring Health Regions Combined Due to Small Populations

| <b>Province</b> | <b>Group</b> | <b>Areas</b>                                                                                                                                        | <b>Name of Combined areas</b>                            |
|-----------------|--------------|-----------------------------------------------------------------------------------------------------------------------------------------------------|----------------------------------------------------------|
| Saskatchewan    | 1            | Mamawetan Churchill River Regional Health Authority (4711), Keewatin Yatthe Regional Health Authority (4712), and Athabasca Health Authority (4713) | Mamawetan/Keewatin/Athabasca Regional Health Authorities |

**eTable 3. Age- and Sex-Adjusted Prevalence of Cardiovascular Risk Factors by Age Group<sup>a</sup>**

| Age groups, years   | 2005             | 2007/08          | 2009/10          | 2011/12          | 2013/14          | 2015/16          | p value | Direction of trend |
|---------------------|------------------|------------------|------------------|------------------|------------------|------------------|---------|--------------------|
| <b>Hypertension</b> |                  |                  |                  |                  |                  |                  |         |                    |
| Both sexes          |                  |                  |                  |                  |                  |                  |         |                    |
| 20~39               | 3.2 (3.0-3.5)    | 3.3 (3.1-3.6)    | 3.1 (2.9-3.4)    | 3.2 (2.9-3.5)    | 3.2 (2.9-3.5)    | 3.7 (3.4-4.1)    | 0.097   | —                  |
| 40~59               | 16.8 (16.2-17.3) | 17.5 (16.9-18.1) | 17.7 (17.0-18.4) | 17.3 (16.6-18.0) | 17.5 (16.7-18.2) | 17.8 (17.1-18.5) | 0.096   | —                  |
| 60~79               | 43.3 (42.5-44.1) | 45.1 (44.3-45.9) | 46.5 (45.6-47.3) | 46.9 (46.0-47.7) | 45.7 (44.8-46.5) | 45.9 (45.0-46.7) | <0.001  | Increase           |
| ≥80                 | 53.3 (51.7-55.0) | 56.8 (55.1-58.6) | 56.8 (54.9-58.7) | 57.7 (56.1-59.2) | 57.5 (55.9-59.2) | 62.9 (61.1-64.7) | <0.001  | Increase           |
| Men                 |                  |                  |                  |                  |                  |                  |         |                    |
| 20~39               | 3.8 (3.3-4.2)    | 3.9 (3.5-4.4)    | 3.9 (3.4-4.3)    | 3.9 (3.4-4.4)    | 4.0 (3.5-4.5)    | 4.5 (3.9-5.0)    | 0.071   | —                  |
| 40~59               | 17.5 (16.7-18.3) | 18.4 (17.5-19.3) | 19.4 (18.3-20.5) | 18.9 (17.9-20.0) | 20.4 (19.2-21.5) | 20.4 (19.4-21.5) | <0.001  | Increase           |
| 60~79               | 41.3 (40.1-42.5) | 43.4 (42.2-44.6) | 45.0 (43.7-46.3) | 47.0 (45.6-48.3) | 46.8 (45.6-48.0) | 47.5 (46.3-48.8) | <0.001  | Increase           |
| ≥80                 | 43.6 (40.8-46.3) | 50.9 (48.2-53.6) | 49.5 (46.5-52.4) | 51.4 (48.8-54.0) | 53.9 (51.3-56.5) | 56.7 (53.5-59.8) | <0.001  | Increase           |
| Women               |                  |                  |                  |                  |                  |                  |         |                    |
| 20~39               | 2.7 (2.4-3.0)    | 2.8 (2.4-3.1)    | 2.4 (2.1-2.7)    | 2.6 (2.2-3.0)    | 2.5 (2.1-2.8)    | 3.0 (2.5-3.5)    | 0.678   | —                  |
| 40~59               | 16.0 (15.3-16.8) | 16.6 (15.8-17.5) | 16.1 (15.1-17.1) | 15.8 (14.9-16.7) | 14.7 (13.8-15.6) | 15.3 (14.4-16.2) | 0.003   | Decrease           |
| 60~79               | 45.0 (43.9-46.1) | 46.7 (45.5-47.8) | 47.7 (46.6-48.8) | 46.8 (45.6-47.9) | 44.6 (43.5-45.7) | 44.3 (43.1-45.5) | 0.021   | Decrease           |
| ≥80                 | 58.7 (56.6-60.8) | 60.1 (57.8-62.4) | 60.9 (58.4-63.4) | 61.1 (58.8-63.3) | 59.5 (57.4-61.6) | 66.3 (64.2-68.5) | <0.001  | Increase           |
| <b>Diabetes</b>     |                  |                  |                  |                  |                  |                  |         |                    |
| Both sexes          |                  |                  |                  |                  |                  |                  |         |                    |
| 20~39               | 1.1 (1.0-1.3)    | 1.3 (1.1-1.5)    | 1.3 (1.1-1.5)    | 1.1 (1.0-1.3)    | 1.2 (1.0-1.4)    | 1.4 (1.2-1.6)    | 0.240   | —                  |
| 40~59               | 5.0 (4.7-5.3)    | 6.0 (5.7-6.4)    | 5.9 (5.5-6.3)    | 5.9 (5.4-6.3)    | 6.2 (5.7-6.6)    | 6.5 (6.1-7.0)    | <0.001  | Increase           |
| 60~79               | 13.7 (13.1-14.2) | 15.4 (14.8-16.1) | 16.0 (15.4-16.6) | 16.6 (15.9-17.4) | 16.7 (16.0-17.3) | 16.4 (15.7-17.1) | <0.001  | Increase           |
| ≥80                 | 13.4 (12.3-14.5) | 15.9 (14.5-17.3) | 18.6 (17.0-20.3) | 16.5 (15.1-17.9) | 16.6 (15.2-17.9) | 17.4 (16.0-18.8) | <0.001  | Increase           |

|                |                  |                  |                  |                  |                  |                  |        |          |
|----------------|------------------|------------------|------------------|------------------|------------------|------------------|--------|----------|
| Men            |                  |                  |                  |                  |                  |                  |        |          |
| 20~39          | 1.0 (0.8-1.2)    | 1.2 (1.0-1.5)    | 1.3 (1.0-1.7)    | 1.0 (0.8-1.3)    | 1.1 (0.8-1.4)    | 1.4 (1.1-1.7)    | 0.345  | —        |
| 40~59          | 5.6 (5.1-6.1)    | 6.9 (6.3-7.5)    | 7.0 (6.3-7.7)    | 6.1 (5.5-6.8)    | 7.4 (6.6-8.1)    | 7.6 (6.9-8.3)    | <0.001 | Increase |
| 60~79          | 16.1 (15.2-17.1) | 17.6 (16.6-18.5) | 19.1 (18.1-20.2) | 19.4 (18.3-20.5) | 19.4 (18.3-20.4) | 18.8 (17.7-19.8) | <0.001 | Increase |
| ≥80            | 15.3 (13.2-17.3) | 18.1 (15.7-20.4) | 22.3 (19.8-24.8) | 19.6 (17.2-21.9) | 17.9 (15.9-19.8) | 19.9 (17.4-22.4) | 0.031  | Increase |
| Women          |                  |                  |                  |                  |                  |                  |        |          |
| 20~39          | 1.2 (1.0-1.4)    | 1.3 (1.1-1.6)    | 1.3 (1.1-1.5)    | 1.2 (1.0-1.5)    | 1.3 (1.0-1.6)    | 1.4 (1.1-1.6)    | 0.475  | —        |
| 40~59          | 4.4 (4.0-4.8)    | 5.2 (4.7-5.7)    | 4.8 (4.3-5.3)    | 5.6 (5.0-6.2)    | 5.0 (4.5-5.5)    | 5.5 (4.9-6.1)    | 0.007  | Increase |
| 60~79          | 11.5 (10.8-12.2) | 13.5 (12.6-14.3) | 13.2 (12.4-14.0) | 14.2 (13.3-15.0) | 14.3 (13.5-15.1) | 14.2 (13.3-15.2) | <0.001 | Increase |
| ≥80            | 12.3 (11.0-13.7) | 14.6 (13.0-16.3) | 16.6 (14.6-18.7) | 14.8 (13.1-16.5) | 15.8 (14.1-17.6) | 16.0 (14.5-17.6) | 0.001  | Increase |
| <b>Obesity</b> |                  |                  |                  |                  |                  |                  |        |          |
| Both sexes     |                  |                  |                  |                  |                  |                  |        |          |
| 20~39          | 13.0 (12.5-13.4) | 14.4 (13.8-14.9) | 14.6 (14.0-15.3) | 14.8 (14.1-15.6) | 16.5 (15.8-17.3) | 16.3 (15.6-16.9) | <0.001 | Increase |
| 40~59          | 18.5 (17.9-19.1) | 19.1 (18.4-19.7) | 20.8 (20.0-21.5) | 21.4 (20.6-22.2) | 22.1 (21.3-22.9) | 23.3 (22.5-24.0) | <0.001 | Increase |
| 60~79          | 18.1 (17.4-18.7) | 20.2 (19.5-20.8) | 20.7 (20.0-21.4) | 21.1 (20.3-21.8) | 21.7 (21.0-22.4) | 22.6 (21.8-23.3) | <0.001 | Increase |
| ≥80            | 10.3 (9.1-11.4)  | 11.2 (10.0-12.5) | 11.8 (10.7-13.0) | 11.0 (10.0-12.1) | 13.4 (12.1-14.7) | 12.1 (10.9-13.3) | 0.003  | Increase |
| Men            |                  |                  |                  |                  |                  |                  |        |          |
| 20~39          | 14.5 (13.8-15.2) | 15.7 (14.9-16.5) | 16.1 (15.1-17.0) | 15.2 (14.2-16.2) | 18.5 (17.3-19.6) | 17.4 (16.4-18.4) | <0.001 | Increase |
| 40~59          | 19.9 (19.0-20.9) | 20.6 (19.6-21.6) | 23.3 (22.2-24.4) | 23.6 (22.5-24.7) | 24.3 (23.0-25.6) | 25.4 (24.3-26.5) | <0.001 | Increase |
| 60~79          | 18.2 (17.2-19.1) | 20.4 (19.4-21.4) | 20.3 (19.3-21.4) | 21.4 (20.2-22.6) | 21.9 (20.9-22.9) | 23.7 (22.6-24.8) | <0.001 | Increase |
| ≥80            | 8.9 (7.3-10.6)   | 9.2 (7.6-10.9)   | 10.7 (9.0-12.5)  | 10.1 (8.5-11.8)  | 11.9 (10.1-13.7) | 12.3 (10.4-14.2) | 0.001  | Increase |
| Women          |                  |                  |                  |                  |                  |                  |        |          |
| 20~39          | 11.5 (10.9-12.1) | 13.1 (12.4-13.8) | 13.2 (12.3-14.1) | 14.5 (13.6-15.4) | 14.6 (13.7-15.5) | 15.1 (14.2-16.1) | <0.001 | Increase |
| 40~59          | 17.2 (16.4-17.9) | 17.6 (16.7-18.4) | 18.3 (17.4-19.3) | 19.3 (18.2-20.4) | 20.0 (19.0-21.0) | 21.2 (20.2-22.2) | <0.001 | Increase |
| 60~79          | 17.9 (17.0-18.8) | 19.9 (19.0-20.9) | 21.0 (20.1-22.0) | 20.8 (19.9-21.7) | 21.5 (20.7-22.4) | 21.5 (20.5-22.5) | <0.001 | Increase |

|                        |                  |                  |                  |                  |                  |                  |        |          |
|------------------------|------------------|------------------|------------------|------------------|------------------|------------------|--------|----------|
| ≥80                    | 11.0 (9.6-12.4)  | 12.3 (10.6-14.0) | 12.4 (10.8-14.0) | 11.5 (10.1-13.0) | 14.3 (12.6-16.0) | 12.0 (10.4-13.6) | 0.154  | —        |
| <b>Current smoking</b> |                  |                  |                  |                  |                  |                  |        |          |
| Both sexes             |                  |                  |                  |                  |                  |                  |        |          |
| 20~39                  | 26.9 (26.2-27.6) | 26.5 (25.7-27.2) | 24.2 (23.4-24.9) | 24.3 (23.4-25.1) | 22.5 (21.7-23.3) | 20.3 (19.6-21.0) | <0.001 | Decrease |
| 40~59                  | 24.0 (23.4-24.7) | 24.6 (23.9-25.4) | 23.5 (22.7-24.2) | 23.6 (22.8-24.5) | 21.3 (20.5-22.2) | 19.9 (19.2-20.6) | <0.001 | Decrease |
| 60~79                  | 13.7 (13.1-14.2) | 13.6 (13.0-14.1) | 13.6 (13.0-14.1) | 12.7 (12.1-13.2) | 12.7 (12.2-13.3) | 12.5 (11.9-13.1) | <0.001 | Decrease |
| ≥80                    | 5.8 (4.9-6.7)    | 5.0 (4.3-5.7)    | 4.9 (4.2-5.7)    | 4.7 (4.0-5.5)    | 4.5 (3.9-5.2)    | 3.8 (3.1-4.4)    | <0.001 | Decrease |
| Men                    |                  |                  |                  |                  |                  |                  |        |          |
| 20~39                  | 30.5 (29.5-31.6) | 30.4 (29.3-31.5) | 28.0 (26.8-29.3) | 27.7 (26.5-28.9) | 27.2 (25.9-28.5) | 24.1 (22.9-25.3) | <0.001 | Decrease |
| 40~59                  | 25.5 (24.5-26.5) | 27.2 (26.1-28.3) | 26.4 (25.2-27.5) | 26.7 (25.3-28.0) | 24.4 (23.1-25.7) | 22.4 (21.4-23.5) | <0.001 | Decrease |
| 60~79                  | 14.5 (13.6-15.3) | 14.7 (13.8-15.6) | 15.0 (14.2-15.8) | 13.6 (12.7-14.5) | 14.0 (13.1-14.9) | 14.0 (13.1-14.8) | 0.123  | —        |
| ≥80                    | 6.6 (4.9-8.3)    | 5.3 (4.2-6.4)    | 5.5 (4.2-6.9)    | 5.5 (4.2-6.8)    | 5.5 (4.3-6.7)    | 3.1 (2.3-4.0)    | 0.001  | Decrease |
| Women                  |                  |                  |                  |                  |                  |                  |        |          |
| 20~39                  | 23.3 (22.5-24.2) | 22.6 (21.7-23.5) | 20.5 (19.5-21.4) | 20.9 (19.7-22.0) | 17.9 (17.0-18.8) | 16.6 (15.7-17.6) | <0.001 | Decrease |
| 40~59                  | 22.6 (21.7-23.5) | 22.1 (21.2-23.0) | 20.6 (19.6-21.6) | 20.7 (19.7-21.7) | 18.4 (17.3-19.4) | 17.5 (16.6-18.4) | <0.001 | Decrease |
| 60~79                  | 12.9 (12.3-13.6) | 12.5 (11.8-13.3) | 12.2 (11.5-12.9) | 11.8 (11.1-12.5) | 11.6 (10.9-12.2) | 11.1 (10.4-11.9) | <0.001 | Decrease |
| ≥80                    | 5.3 (4.4-6.3)    | 4.8 (4.0-5.6)    | 4.6 (3.7-5.5)    | 4.3 (3.4-5.3)    | 4.0 (3.2-4.8)    | 4.2 (3.2-5.1)    | 0.025  | Decrease |
| <b>≥2 risk factors</b> |                  |                  |                  |                  |                  |                  |        |          |
| Both sexes             |                  |                  |                  |                  |                  |                  |        |          |
| 20~39                  | 5.5 (5.2-5.8)    | 6.3 (5.9-6.6)    | 6.0 (5.5-6.4)    | 6.0 (5.5-6.5)    | 6.2 (5.8-6.6)    | 6.2 (5.8-6.7)    | 0.042  | Increase |
| 40~59                  | 13.2 (12.7-13.7) | 14.2 (13.6-14.8) | 14.9 (14.3-15.6) | 15.1 (14.4-15.8) | 14.8 (14.1-15.5) | 15.6 (14.9-16.2) | <0.001 | Increase |
| 60~79                  | 22.1 (21.4-22.8) | 24.3 (23.6-25.1) | 25.6 (24.9-26.3) | 25.8 (24.9-26.7) | 26.4 (25.7-27.1) | 26.0 (25.2-26.8) | <0.001 | Increase |
| ≥80                    | 17.0 (15.7-18.4) | 18.4 (16.9-19.9) | 21.0 (19.2-22.9) | 19.2 (17.7-20.7) | 20.3 (18.8-21.8) | 22.9 (21.3-24.5) | <0.001 | Increase |
| Men                    |                  |                  |                  |                  |                  |                  |        |          |

|       |                  |                  |                  |                  |                  |                  |        |          |
|-------|------------------|------------------|------------------|------------------|------------------|------------------|--------|----------|
| 20~39 | 6.2 (5.7-6.7)    | 7.1 (6.5-7.7)    | 6.8 (6.2-7.4)    | 6.2 (5.6-6.8)    | 7.4 (6.6-8.2)    | 7.2 (6.5-7.9)    | 0.036  | Increase |
| 40~59 | 14.1 (13.3-14.8) | 15.9 (15.0-16.8) | 17.3 (16.2-18.3) | 17.2 (16.0-18.3) | 17.7 (16.6-18.8) | 18.3 (17.2-19.3) | <0.001 | Increase |
| 60~79 | 22.8 (21.7-23.8) | 25.2 (24.2-26.3) | 26.7 (25.6-27.9) | 27.5 (26.1-28.9) | 28.3 (27.2-29.5) | 28.3 (27.1-29.5) | <0.001 | Increase |
| ≥80   | 15.6 (13.5-17.6) | 17.0 (14.5-19.6) | 20.3 (17.7-22.8) | 18.9 (16.5-21.4) | 20.3 (18.1-22.5) | 23.9 (21.0-26.8) | <0.001 | Increase |
| Women |                  |                  |                  |                  |                  |                  |        |          |
| 20~39 | 4.9 (4.5-5.3)    | 5.5 (5.0-5.9)    | 5.1 (4.6-5.7)    | 5.7 (5.0-6.5)    | 5.0 (4.5-5.5)    | 5.2 (4.6-5.8)    | 0.676  | —        |
| 40~59 | 12.3 (11.7-13.0) | 12.6 (11.9-13.3) | 12.6 (11.8-13.5) | 13.1 (12.2-14.0) | 11.9 (11.2-12.7) | 13.0 (12.1-13.8) | 0.626  | —        |
| 60~79 | 21.5 (20.6-22.4) | 23.5 (22.5-24.5) | 24.5 (23.5-25.5) | 24.2 (23.2-25.3) | 24.6 (23.7-25.6) | 23.8 (22.7-24.8) | 0.001  | Increase |
| ≥80   | 17.8 (16.1-19.6) | 19.1 (17.2-21.0) | 21.5 (19.1-23.8) | 19.3 (17.5-21.2) | 20.3 (18.4-22.2) | 22.3 (20.4-24.2) | 0.002  | Increase |

Numbers in the table are percentage (95% confidence interval).

<sup>a</sup> Because 10-year interval of age is used to calculate age- and sex-adjusted prevalence of cardiovascular risk factors in this study, age comparisons with 20-year interval in the Table are still adjusted for age. Sex comparisons are not adjusted for sex.

**eTable 4.** Health regions With Most Rapid Increase or Decline in Age- and Sex-Adjusted Prevalence of Cardiovascular Risk Factors

|                        | Most rapid increase                                      |                | Most rapid decrease                                      |                |
|------------------------|----------------------------------------------------------|----------------|----------------------------------------------------------|----------------|
|                        | Health regions                                           | Percent change | Health regions                                           | Percent change |
| <b>Hypertension</b>    |                                                          |                |                                                          |                |
|                        | Kelsey Trail Regional Health Authority                   | 56.8%          | Région de l'Outaouais                                    | -22.9%         |
|                        | East Kootenay Health Service Delivery Area               | 43.0%          | Edmundston Area                                          | -18.1%         |
|                        | Prince Albert Parkland Regional Health Authority         | 30.9%          | North Shore/Coast Garibaldi Health Service Delivery Area | -13.4%         |
|                        | Cypress Regional Health Authority                        | 30.8%          | Interlake - Eastern Regional Health Authority            | -10.6%         |
|                        | Sun Country Regional Health Authority                    | 30.3%          | Vancouver Health Service Delivery Area                   | -10.0%         |
| <b>Diabetes</b>        |                                                          |                |                                                          |                |
|                        | North Vancouver Island Health Service Delivery Area      | 95.2%          | Kootenay - Boundary Health Service Delivery Area         | -44.9%         |
|                        | City of Toronto Health Unit                              | 90.5%          | North Bay Parry Sound District Health Unit               | -26.1%         |
|                        | Halton Regional Health Unit                              | 86.9%          | Fraser North Health Service Delivery Area                | -22.5%         |
|                        | Five Hills Regional Health Authority                     | 74.4%          | The District of Algoma Health Unit                       | -22.4%         |
|                        | Lambton Health Unit                                      | 71.9%          | Okanagan Health Service Delivery Area                    | -21.8%         |
| <b>Obesity</b>         |                                                          |                |                                                          |                |
|                        | Leeds, Grenville and Lanark District Health Unit         | 93.8%          | Richmond Health Service Delivery Area                    | -36.2%         |
|                        | Kingston, Frontenac and Lennox and Addington Health Unit | 81.2%          | Vancouver Health Service Delivery Area                   | -23.0%         |
|                        | Haliburton, Kawartha, Pine Ridge District Health Unit    | 80.6%          | Central Vancouver Island Health Service Delivery Area    | -16.2%         |
|                        | Région de l'Abitibi-Témiscamingue                        | 75.6%          | Nunavut                                                  | -10.2%         |
|                        | Région de la Côte-Nord                                   | 65.5%          | Heartland Regional Health Authority                      | -5.5%          |
| <b>Current smoking</b> |                                                          |                |                                                          |                |
|                        | Campbellton area                                         | 86.9%          | Cypress Regional Health                                  | -46.4%         |



|                        |                                                                |       | Authority                                             |        |
|------------------------|----------------------------------------------------------------|-------|-------------------------------------------------------|--------|
|                        | Nunavut                                                        | 35.5% | Peel Regional Health Unit                             | -38.5% |
|                        | The District of Algoma Health Unit                             | 33.9% | Moncton Area                                          | -38.2% |
|                        | Mamawetan/Keewatin/Athabasca Regional Health Authorities       | 18.1% | Haldimand - Norfolk Health Unit                       | -36.6% |
|                        | Western/Labrador-Grenfell Regional Integrated Health Authority | 17.3% | Région de Laval                                       | -35.9% |
| <b>≥2 risk factors</b> |                                                                |       |                                                       |        |
|                        | Haliburton, Kawartha, Pine Ridge District Health Unit          | 80.9% | Vancouver Health Service Delivery Area                | -17.6% |
|                        | City of Toronto Health Unit                                    | 55.7% | Prairie North Regional Health Authority               | -13.0% |
|                        | The District of Algoma Health Unit                             | 53.5% | South Vancouver Island Health Service Delivery Area   | -10.0% |
|                        | Eastern Regional Integrated Health Authority                   | 44.9% | Central Vancouver Island Health Service Delivery Area | -8.3%  |
|                        | Western/Labrador-Grenfell Regional Integrated Health Authority | 44.8% | Région de l'Outaouais                                 | -7.6%  |

**eFigure 1. Health Region–Level Age- and Sex-Adjusted Prevalence of Hypertension**

(A) Age- and sex-adjusted prevalence of hypertension, both sexes, 2015/16

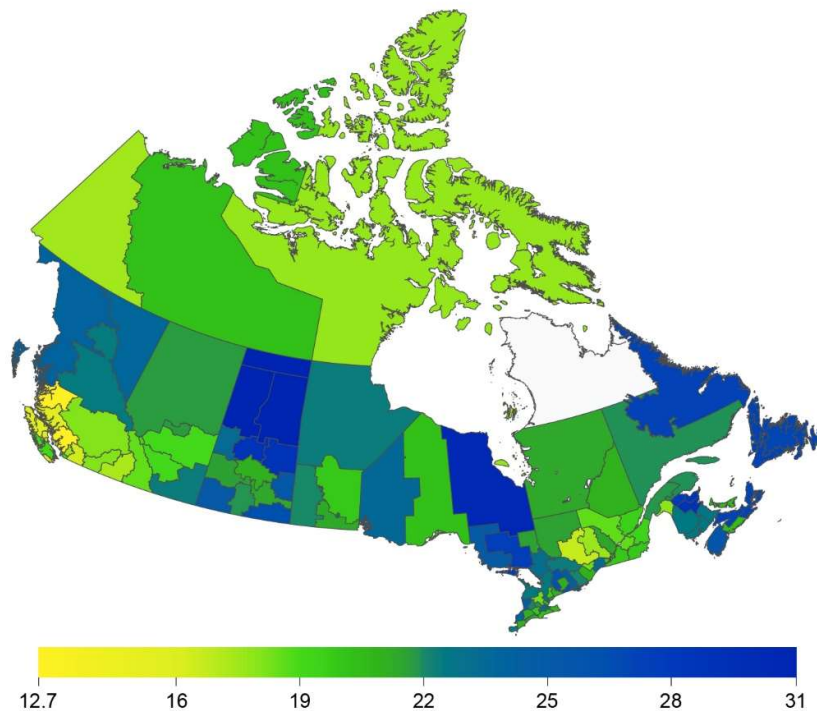

(B) Percent change in age- and sex-adjusted prevalence of hypertension from 2005 to 2016, both sexes

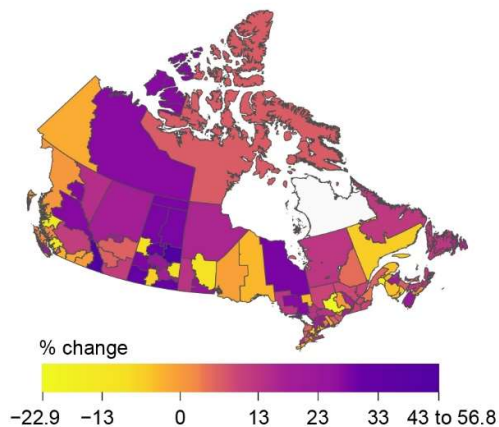

(C) Age- and sex-adjusted prevalence of hypertension over time, both sexes

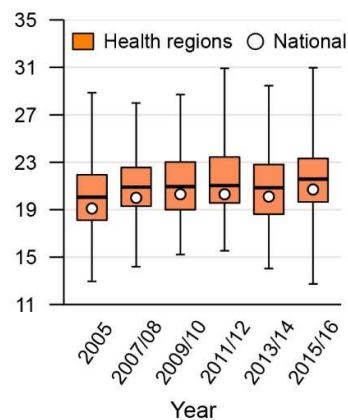

A) Age- and sex-adjusted prevalence of hypertension for both sexes combined in 2015/16. B) Percent change in the age- and sex-adjusted prevalence of hypertension for both sexes combined from 2005 to 2016. In A) and B), two health regions (i.e. Région du Nunavik, and Région des Terres Cries de la Baie James) were filled with blank because of missing data. C) Age- and sex-adjusted prevalence of hypertension in each survey cycle. The bottom border, middle line, and top border of the boxes indicate the 25th, 50th, and 75th percentiles, respectively, across all health regions; the whiskers indicate the full range across all health regions; and the circles indicate the national-level prevalence rate.

**eFigure 2. Health Region–Level Age- and Sex-Adjusted Prevalence of Diabetes**

(A) Age- and sex-adjusted prevalence of diabetes, both sexes, 2015/16

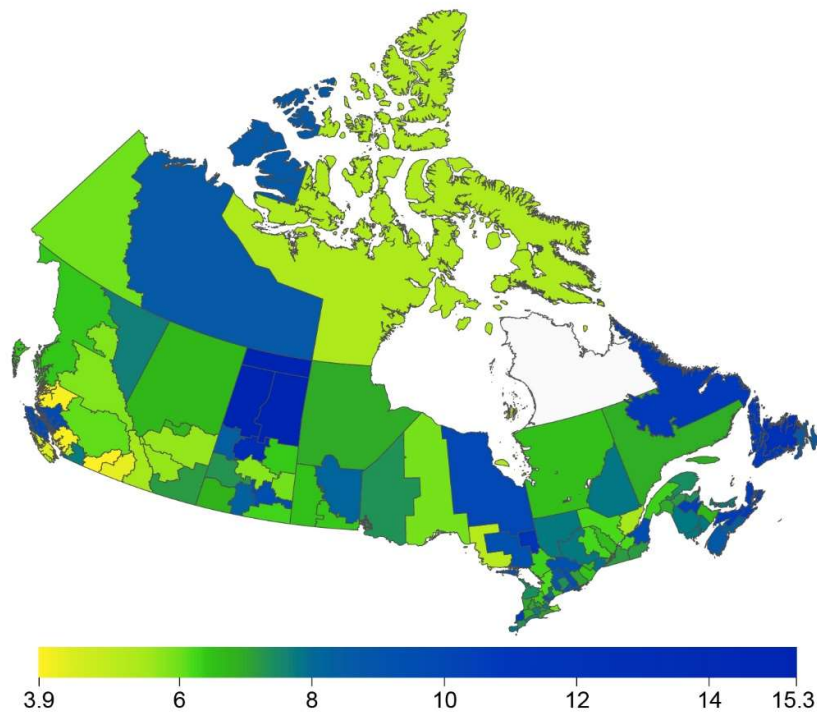

(B) Percent change in age- and sex-adjusted prevalence of diabetes from 2005 to 2016, both sexes

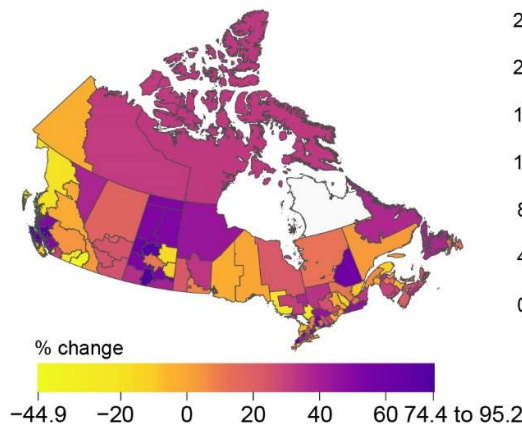

(C) Age- and sex-adjusted prevalence of diabetes over time, both sexes

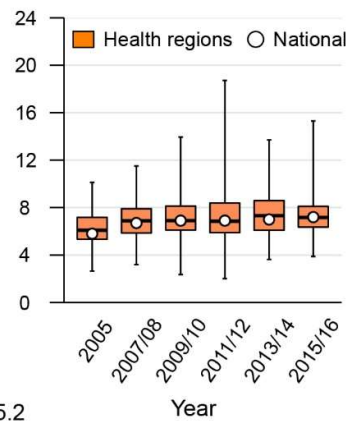

A) Age- and sex-adjusted prevalence of diabetes for both sexes combined in 2015/16. B) Percent change in the age- and sex-adjusted prevalence of diabetes for both sexes combined from 2005 to 2016. In A) and B), two health regions (i.e. Région du Nunavik, and Région des Terres Cries de la Baie James) were filled with blank because of missing data. C) Age- and sex-adjusted prevalence of diabetes in each survey cycle. The bottom border, middle line, and top border of the boxes indicate the 25th, 50th, and 75th percentiles, respectively, across all health regions; the whiskers indicate the full range across all health regions; and the circles indicate the national-level prevalence rate.

**eFigure 3. Health Region–Level Age- and Sex-Adjusted Prevalence of Obesity**

(A) Age- and sex-adjusted prevalence of obesity, both sexes, 2015/16

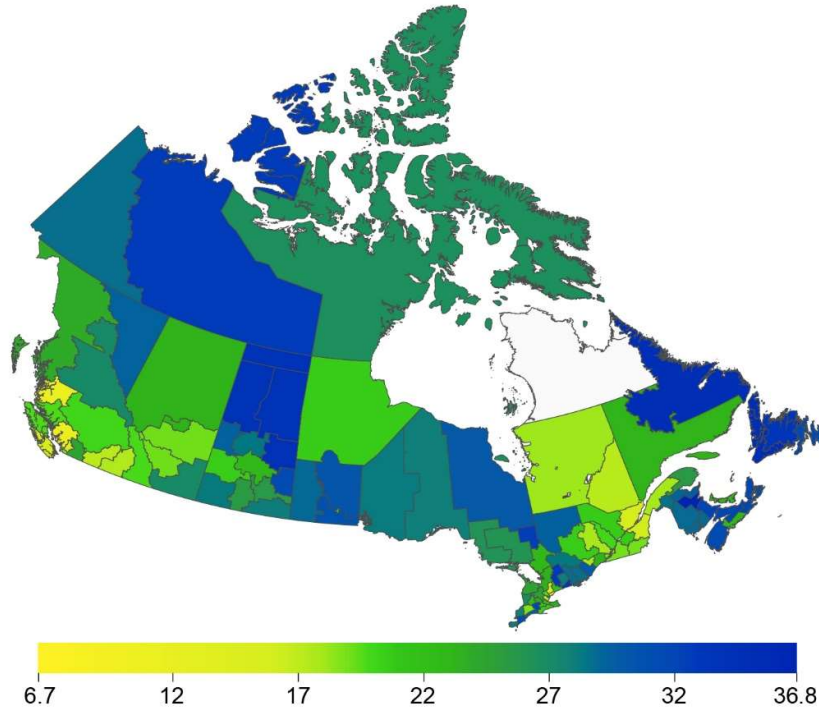

(B) Percent change in age- and sex-adjusted prevalence of obesity from 2005 to 2016, both sexes

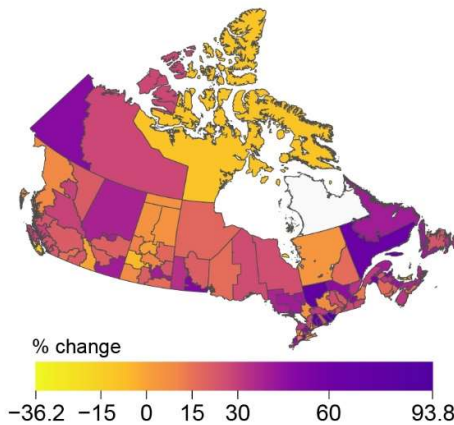

(C) Age- and sex-adjusted prevalence of obesity over time, both sexes

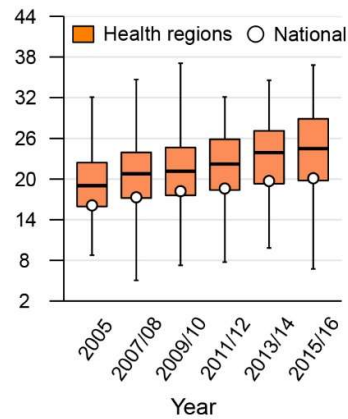

A) Age- and sex-adjusted prevalence of obesity for both sexes combined in 2015/16. B) Percent change in the age- and sex-adjusted prevalence of obesity for both sexes combined from 2005 to 2016. In A) and B), two health regions (i.e. Région du Nunavik, and Région des Terres Cries de la Baie James) were filled with blank because of missing data. C) Age- and sex-adjusted prevalence of obesity in each survey cycle. The bottom border, middle line, and top border of the boxes indicate the 25th, 50th, and 75th percentiles, respectively, across all health regions; the whiskers indicate the full range across all health regions; and the circles indicate the national-level prevalence rate.

**eFigure 4. Health Region–Level Age- and Sex-Adjusted Prevalence of Current Smoking**

(A) Age- and sex-adjusted prevalence of current smoking, both sexes, 2015/16

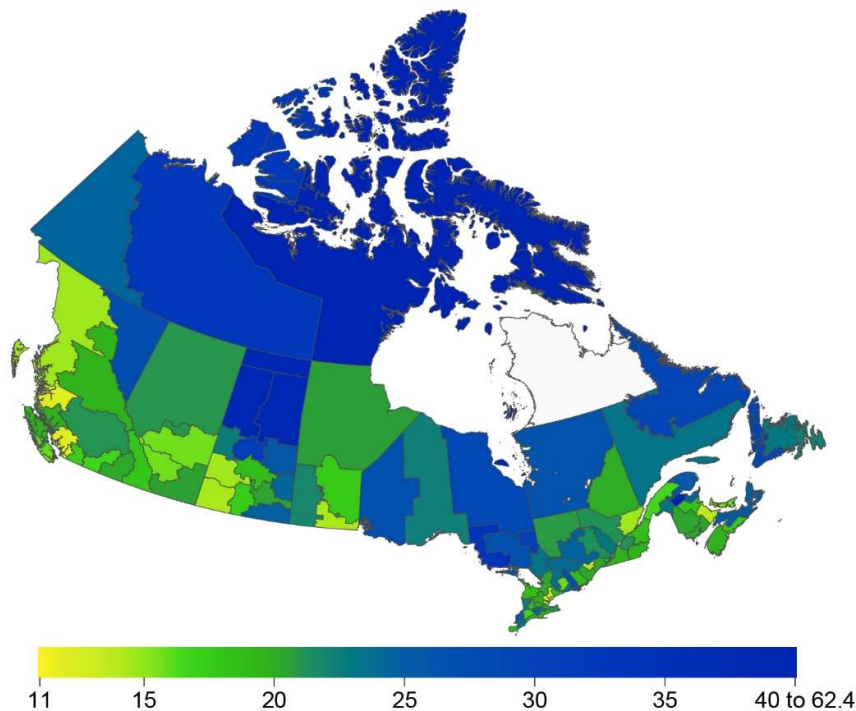

(B) Percent change in age- and sex-adjusted prevalence of current smoking from 2005 to 2016, both sexes

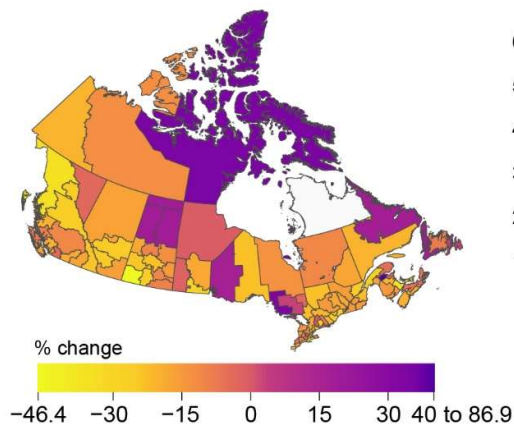

(C) Age- and sex-adjusted prevalence of current smoking over time, both sexes

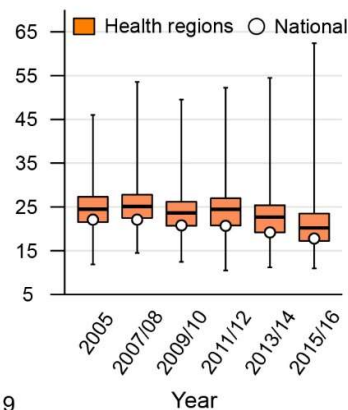

A) Age- and sex-adjusted prevalence of current smoking for both sexes combined in 2015/16. B) Percent change in the age- and sex-adjusted prevalence of current smoking for both sexes combined from 2005 to 2016. In A) and B), two health regions (i.e. Région du Nunavik, and Région des Terres Cries de la Baie James) were filled with blank because of missing data. C) Age- and sex-adjusted prevalence of current smoking in each survey cycle. The bottom border, middle line, and top border of the boxes indicate the 25th, 50th, and 75th percentiles, respectively, across all health regions; the whiskers indicate the full range across all health regions; and the circles indicate the national-level prevalence rate.



**eFigure 5.** Age-Adjusted Prevalence of Cardiovascular Risk Factors by Income Quartile and Sex

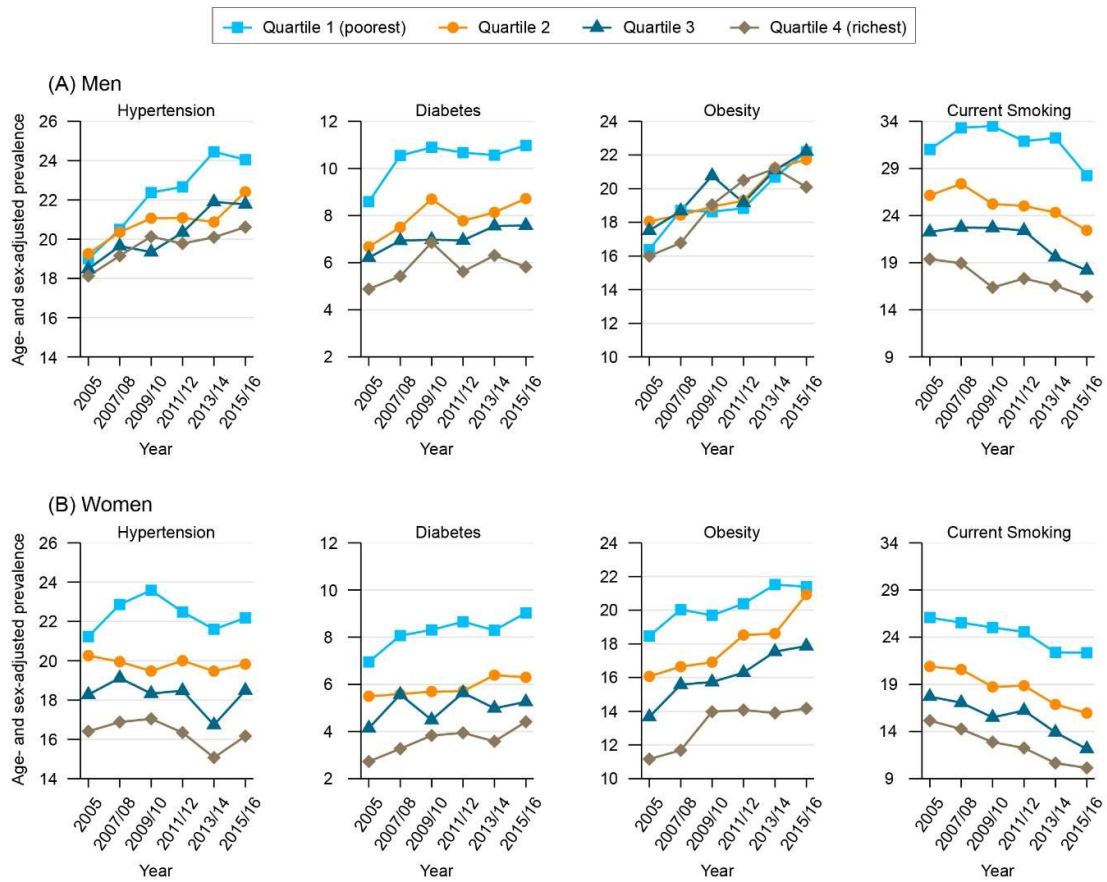

Sex comparisons are only adjusted for age.
